# Supplementary material for: An aptamer-based fluorescence biosensor for multiplex detection using unmodified gold nanoparticles
Source: Royal Society of Chemistry journal article supplement (doi:10.1039/c2cc32667a), 2012-01-01
Supplement: c2cc32667a.pdf [file c2cc32667a.pdf]

## Supporting Information

### Experimental Sections

#### Reagents and Apparatus

Hydrogen tetrachloroaurate(III) ( $\text{HAuCl}_4 \cdot 4\text{H}_2\text{O}$ ) was obtained from Sangon Inc. (Shanghai, China). Adenosine, thrombin, cocaine and their analogues were purchased from Sigma (St. Louis, MO, USA). The working solution of the oligonucleotide was obtained by diluting the stock solution with a 30 mM Tris-HCl buffer (pH 7.4), which contains 100mM NaCl. All other chemicals were of analytical reagent grade and used without further purifying, while twice-distilled water was used throughout the whole process. Cary Eclipse Fluorescence Spectrophotometer (Varian, USA) was used for monitoring adsorption spectra. The apparatus parameters were set as follows:  $\lambda_{\text{ex(AMCA)}}$  = 353 nm (slit 10 nm),  $\lambda_{\text{em}}$  = 400-600 nm (slit 10 nm),  $\lambda_{\text{ex(FAM)}}$  = 490 nm (slit 10 nm),  $\lambda_{\text{em}}$  = 500-600 nm (slit 10 nm).  $\lambda_{\text{ex(ROX)}}$  = 580 nm (slit 10 nm), and  $\lambda_{\text{em}}$  = 590-700 nm (slit 10 nm). UV/visible (UV/vis) adsorption spectra were recorded on a Hitachi U-3900H UV/vis spectrophotometer (Kyoto, Japan) at room temperature. The TEM (Transmission electron microscopy) images of nanoparticles were obtained on a transmission microscope (Tecnai G2 F20 S-TWIN 200KV).

The engineered aptamers used herein were synthesized and purified by Sangon Inc. (Shanghai, China). The sequences of the involved oligonucleotides are listed below.

Anticocaine aptamer chips: 5'-AMCA-AGACAAGGAAAA-3' ( $\text{C}_1$ )

5'-TCCTTCAATGAAGTGGGTCG-3' ( $\text{C}_2$ )

23 Antiadenosine aptamer chips: 5'-ROX-AGCGGAGGAAGG-3' (A<sub>1</sub>)

24 5'-ACCTGGGGGAGTAT-3' (A<sub>2</sub>)

25 Antithrombin aptamer: 5'-FAM-GGTTGGTGTGGTTGG-3' (T<sub>1</sub>)

26

## 27 **Synthesis of AuNPs**

28 AuNPs (~15nm in diameter) were synthesized according to the previous literature<sup>S1</sup>.

29 In brief, 50 mL of 2.5×10<sup>-4</sup> M HAuCl<sub>4</sub> solution was boiled and stirred vigorously;

30 then, it was followed by the adding of 1.75 mL of 1% sodium citrate solution into the

31 boiling solution; the color change from light yellow to red in the solution was

32 recorded after 30 min boiling, 15 min stirring. Subsequently it was cooled to room

33 temperature and stored in a fridge at 4 C for further use. The concentration of Au-NPs

34 was about 1.4×10<sup>15</sup> particles L<sup>-1</sup> based on completely reaction estimation.

## 35 **Performance of Multiplex Analyte Detection**

36 10 μL three dye-modified nucleosides (C<sub>1</sub>, A<sub>1</sub>, T<sub>1</sub>) and two unmodified (C<sub>2</sub>, A<sub>2</sub>)

37 sequences were mixed and added to a solution (150 μL, 5 nM) of unmodified AuNPs

38 with a concentration of 0.5 μM each. The mixture was then relaxed allowing for 10

39 min reaction and sufficient absorption at room temperature. In order to detect

40 multiplex analytes, a mixture of cocaine, thrombin, and adenosine (5 μL) was added

41 to above solution for 4 h incubation time. Specifically, the emission of Rox-labeled

42 antiadenosine aptamer-chip by adenosine appears at 607 nm, the emission of

43 FAM-labeled G-quartet by thrombin at 520 nm, and the emission of AMCA- labeled

44 anti-cocaine aptamer- chip by cocaine at 353 nm.

## 45 **Cross-Reaction Analysis**

46 In order to prove that these fluorescent dyes don't have cross interference with each  
47 other, an AMCA solution, a FAM solution, a ROX solution and a mixed solution  
48 containing AMCA, FAM and ROX (the concentration of each in the mixed solution is  
49 the same with that of pure solution) were analyzed by Fluorescent Spectrometry. The  
50 apparatus parameters are set as follows:  $\lambda_{\text{ex}}(\text{AMCA})= 353 \text{ nm}$ ,  $\lambda_{\text{em}}= 400\text{-}800 \text{ nm}$ ,  
51  $\lambda_{\text{ex}}(\text{FAM})= 490 \text{ nm}$ ,  $\lambda_{\text{em}}= 500\text{-}800 \text{ nm}$ .  $\lambda_{\text{ex}}(\text{ROX})= 580 \text{ nm}$ , and  $\lambda_{\text{em}}= 590\text{-}800 \text{ nm}$ .  
52 The results were shown in Figure S1, line a, b and c is the fluorescence signal of  
53 AMCA, FAM and ROX, respectively. The results showed that the wavelengths of the  
54 max fluorescence intensity were 454nm, 516nm, 606nm respectively, and there has  
55 little interference for each other.

56 Then, setting the apparatus parameters of mixed solution as follows:  $\lambda_{\text{ex}}= 353 \text{ nm}$ ,  
57  $\lambda_{\text{em}}= 400\text{-}800 \text{ nm}$ . As shown in line d, which is nearly the same as line a, but there is a  
58 very weak interference peak at about 600 nm. Followed by setting the apparatus  
59 parameters of mixed solution as follows:  $\lambda_{\text{ex}}= 490 \text{ nm}$ ,  $\lambda_{\text{em}}= 500\text{-}800 \text{ nm}$ . The result  
60 was shown as line e, there is no significant difference with that of line b. These results  
61 indicated that is no obvious cross reaction among AMCA, FAM and ROX.

## 62 Reference

63 S1 A. Doron, E. Katz, I. Willner, *Langmuir*, 1995, **11**, 1313–1317.

64

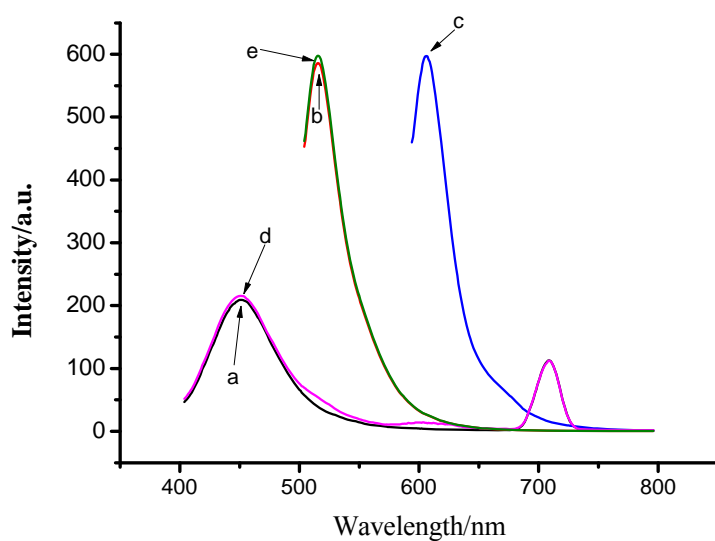

65

66 Figure S1 The fluorescence spectra of AMCA, FAM and ROX and the mixed solution

67 (a: AMCA; b: FAM; c: ROX in pure solution, d: AMCA in mixed solution, e: FAM in

68 mixed solution)

69

70

71

72

**Table S1 The structures of the fluorescent dyes**

| Fluorescent dye | Structure                                                                           | Excitation wavelength (nm) | Emission wavelength (nm) |
|-----------------|-------------------------------------------------------------------------------------|----------------------------|--------------------------|
| AMCA            | 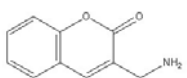 | 353                        | 442                      |
| ROX             |  | 588                        | 608                      |
| FAM             |  | 495                        | 520                      |

73

74 Table S2 The related linear results of the proposed aptamer-based fluorescence

75 biosensor

76

| Targets   | Concentration range (mol/L)                  | Regression equation                   | Regression coefficient R | Detection limit (mol/L) |
|-----------|----------------------------------------------|---------------------------------------|--------------------------|-------------------------|
| Thrombin  | $5.0 \times 10^{-8} \sim 2.5 \times 10^{-6}$ | $I/a.u = 200.68 + 1.05 \times 10^8 C$ | 0.9983                   | $2.5 \times 10^{-9}$    |
| Cocaine   | $1.0 \times 10^{-7} \sim 2.0 \times 10^{-6}$ | $I/a.u = 78.21 + 5.79 \times 10^7 C$  | 0.9978                   | $3.0 \times 10^{-8}$    |
| Adenosine | $1.0 \times 10^{-8} \sim 1.0 \times 10^{-6}$ | $I/a.u = 292.59 + 2.45 \times 10^8 C$ | 0.9938                   | $2.0 \times 10^{-9}$    |

77

78
